# Supplementary material for: Clinical and immunological assessment of asymptomatic SARS-CoV-2 infections
Source: Springer Nature journal article supplement (doi:10.1038/s41591-020-0965-6), 2020-06-18
Supplement: 41591_2020_965_MOESM1_ESM.pdf [file 41591_2020_965_MOESM1_ESM.pdf]

In the format provided by the authors and unedited.

# Clinical and immunological assessment of asymptomatic SARS-CoV-2 infections

Quan-Xin Long <sup>1,8</sup>, Xiao-Jun Tang<sup>2,8</sup>, Qiu-Lin Shi<sup>2,8</sup>, Qin Li<sup>3,8</sup>, Hai-Jun Deng <sup>1,8</sup>, Jun Yuan<sup>1</sup>, Jie-Li Hu<sup>1</sup>, Wei Xu<sup>2</sup>, Yong Zhang <sup>2</sup>, Fa-Jin Lv<sup>4</sup>, Kun Su<sup>3</sup>, Fan Zhang<sup>5</sup>, Jiang Gong<sup>5</sup>, Bo Wu<sup>6</sup>, Xia-Mao Liu<sup>7</sup>, Jin-Jing Li<sup>7</sup>, Jing-Fu Qiu <sup>2</sup>✉, Juan Chen <sup>1</sup>✉ and Ai-Long Huang <sup>1</sup>✉

<sup>1</sup>Key Laboratory of Molecular Biology on Infectious Diseases, Ministry of Education, Chongqing Medical University, Chongqing, China. <sup>2</sup>School of Public Health and Management, Chongqing Medical University, Chongqing, China. <sup>3</sup>Chongqing Center for Disease Control and Prevention, Chongqing, China.

<sup>4</sup>Department of Radiology, The First Affiliated Hospital of Chongqing Medical University, Chongqing, China. <sup>5</sup>Wanzhou People's Hospital, Chongqing, China. <sup>6</sup>Wanzhou District Center for Disease Control and Prevention, Chongqing, China. <sup>7</sup>The Second Affiliated Hospital of Chongqing Medical University, Chongqing, China. <sup>8</sup>These authors contributed equally: Quan-Xin Long, Xiao-Jun Tang, Qiu-Lin Shi, Qin Li, Hai-Jun Deng.

✉e-mail: [jfqiu@126.com](mailto:jfqiu@126.com); [chenjuan2014@cqmu.edu.cn](mailto:chenjuan2014@cqmu.edu.cn); [ahuang@cqmu.edu.cn](mailto:ahuang@cqmu.edu.cn)

## Supplementary information

**Supplementary Table 1. Clinical characteristics of asymptomatic cases and symptomatic cases recruited in this study.**

|                        | Asymptomatic<br>(N=37) | Symptomatic<br>(N=37) | <i>p</i> value |
|------------------------|------------------------|-----------------------|----------------|
| Age (median, IQR)      | 41 (27-50)             | 41 (23-50)            | 0.729          |
| Sex                    |                        |                       |                |
| Female                 | 22 (59.5%)             | 18 (48.6%)            | 0.484          |
| Male                   | 15 (40.5%)             | 19 (51.4%)            |                |
| Exposure               |                        |                       |                |
| From Wuhan             | 15 (40.5%)             | 9 (24.3%)             | 0.214          |
| close contacts         | 22 (59.5%)             | 28 (75.7%)            |                |
| <b>Comorbidities</b>   |                        |                       |                |
| Any                    | 9 (24.3%)              | 13 (35.1%)            | 0.445          |
| Hypertension           | 7 (13.5%)              | 7 (18.9%)             | 1.000          |
| Cardiovascular disease | 0 (0.0%)               | 2 (5.4%)              | 0.473          |
| Diabetes               | 1 (2.7%)               | 4 (10.8%)             | 0.354          |
| Chronic kidney disease | 0 (0.0%)               | 1 (2.7%)              | 1.000          |
| Chronic liver disease  | 2 (5.4%)               | 2 (5.4%)              | 1.000          |
| Tuberculosis           | 0 (0.0%)               | 1 (2.7%)              | 1.000          |

Unpaired, Two sided Mann-Whitney U test was performed to compare continuous characteristics, and Fisher's exact test was performed to compare categorical characteristics between groups.

**Supplementary Table 2. Clinical information of asymptomatic cases recruited in this study.**

| Characteristics                                              | Asymptomatic<br>(N=37) |
|--------------------------------------------------------------|------------------------|
| Age (median, IQR)                                            | 41 (27-50)             |
| Sex (Male/Female)                                            |                        |
| Male                                                         | 15 (40.5%)             |
| Female                                                       | 22 (59.5%)             |
| Exposure                                                     |                        |
| From Wuhan                                                   | 9 (24.3%)              |
| Close contacts                                               | 28 (75.7%)             |
| Liver Function                                               |                        |
| Normal                                                       | 25 (67.6%)             |
| Abnormal                                                     | 12 (32.4%)             |
| Duration of viral shedding (median, IQR)                     | 19 (15-26)             |
| Physical examination                                         |                        |
| Body temperature                                             | 36.5 (36.5-36.6)       |
| Heart rate, median (IQR), bpm                                | 82 (78-90.2)           |
| Respiratory rate, median (IQR)                               | 20 (19.2-20)           |
| Mean arterial pressure, median (IQR), mm Hg                  | 94.8 (86.8-106.6)      |
| Comorbidities                                                |                        |
| Hypertension                                                 | 7 (18.9%)              |
| Blood routine                                                |                        |
| Whiteblood count, $\times 10^9$ /L, normal range 3.5-9.5     | 5.8 (5.5-7.2)          |
| Neutrophil count, $\times 10^9$ /L, normal range 1.8-6.3     | 3.8 (3.1-4.9)          |
| Lymphocyte count, $\times 10^9$ /L, normal range 1.1-3.2     | 1.7 (1.4-2.1)          |
| Monocyte count, $\times 10^9$ /L, normal range 0.1-0.6       | 0.3 (0.3-0.4)          |
| Platelet count, $\times 10^9$ /L, normal range 125-350       | 211.5 (171-248.2)      |
| Hemoglobin, g/L, normal range 115-150                        | 130 (122.8-148.8)      |
| Coagulation function                                         |                        |
| Prothrombin time, s, normal range 11.5-14                    | 13 (12.8-13.5)         |
| Activated partial thromboplastin time, s, normal range 28-44 | 37.5 (35.3-39.5)       |
| D-dimer, mg/L, normal range <0.5                             | 0.4 (0.4-0.5)          |
| Blood biochemistry                                           |                        |
| Albumin, g/L, normal range 40-55                             | 43.8 (42.2-44.7)       |
| Alanine aminotransferase, U/L, normal range 7-40             | 15 (10-28)             |
| Aspartate aminotransferase, U/L, normal range 13-35          | 17.5 (15-23)           |
| Total bilirubin, $\mu\text{mol/L}$ , normal range 0-21       | 14.6 (10.7-21.6)       |
| Blood urea nitrogen, mmol/L, normal range 1.7-8.3            | 3.5 (3.1-4.2)          |
| Creatinine, $\mu\text{mol/L}$ , normal range 40-80           | 60.2 (56.6-68.8)       |
| Creatine kinase, U/L, normal range 26-140                    | 52 (46-88)             |
| Lactate dehydrogenase, U/L, normal range 114-240             | 153.5 (129.8-184.5)    |
| Infection-related biomarkers                                 |                        |
| Procalcitonin, ng/ml, normal range <0.05                     | 0.02 (0.02-0.04)       |

---

|                                                       |                     |
|-------------------------------------------------------|---------------------|
| Serum ferritin, $\mu\text{mol/L}$ , normal range 7-30 | 22.3 (15.7-28.6)    |
| CRP, mg/L, normal range <10                           | 1.5 (1.1-3.3)       |
| Hypersensitive troponinI, ng/ml, <0.01                | 0.005 (0.004-0.006) |

---

CRP, C-Reactive Protein

Continuous variables were expressed as the median (interquartile range, IQR). Categorical variables were expressed as numbers (%).
